# Supplementary material for: Multicomponent Polyphenolic Extracts from Vaccinium corymbosum at Lab and Pilot Scale. Characterization and Effectivity against Nosocomial Pathogens
Source: MDPI journal article supplement (doi:10.3390/plants10122801), 2021-12-17
Supplement: s1 [file s1]

## Supplementary material

# Multicomponent polyphenolic extracts from *Vaccinium corymbosum* at lab and pilot scale. Characterization and effectivity against nosocomial pathogens

Eva Gato <sup>1</sup>, Astrid Perez<sup>1\*</sup>, Alicja Rosalowska <sup>2</sup>, Maria Celeiro <sup>3</sup>, German Bou <sup>1</sup> and Marta Lores <sup>2,\*</sup>

<sup>1</sup> Departamento de Microbiología, Complejo Hospitalario Universitario A Coruña (CHUAC), Instituto de Investigación Biomédica A Coruña (INIBIC), Universidad de A Coruña (UDC), A Coruña (Spain); eva.gato.corral@sergas.es; astrid.perez.gomez@gmail.com; german.bou.arevalo@sergas.es

<sup>2</sup> LIDSA, Department of Analytical Chemistry, Nutrition and Food Science, Universidade de Santiago de Compostela, E-15782 Santiago de Compostela, Spain; marta.lores@usc.es; ally.rosalowska@gmail.com

<sup>3</sup> CRETUS, Department of Analytical Chemistry, Nutrition and Food Science, Universidade de Santiago de Compostela, E-15782 Santiago de Compostela, Spain; maria.celeiro.montero@usc.es

\* Correspondence: astrid.perez.gomez@gmail.com (A.P.); marta.lores@usc.es (M.L.)

**Table S1.** Studied compounds. CAS number, ionization mode, retention time, MS/MS transitions and suppliers.

| Compound                                | CAS        | Ionization mode | Retention time (min) | MS/MS transitions (Collision energy, eV) <sup>a</sup>                       |
|-----------------------------------------|------------|-----------------|----------------------|-----------------------------------------------------------------------------|
| Gallic acid <sup>b</sup>                | 149-91-7   | -               | 2.25                 | <u>169.02 → 125.04 (17)</u><br>169.02 → 153.1 (15)                          |
| 2,4,6-trihydrobenzoic acid <sup>b</sup> | 487-70-7   | +               | 3.23                 | <u>168.98 → 150.99 (17)</u><br>168.98 → 83.02 (23)<br>168.98 → 107.02 (22)  |
| 2,4-dihydroxybenzoic acid <sup>b</sup>  | 89-86-1    | +               | 3.69                 | <u>153.00 → 109.05 (16)</u><br>153.00 → 65.09 (19)<br>153.00 → 67.07 (23)   |
| 3,4-dihydroxybenzoic acid <sup>b</sup>  | 99-50-3    | +               | 3.70                 | <u>152.98 → 109.04 (17)</u><br>152.98 → 91.04 (28)<br>152.98 → 108.03 (26)  |
| Caftaric Acid <sup>b</sup>              | 67879-58-7 | -               | 4.21                 | <u>310.96 → 178.97 (17)</u><br>310.96 → 148.96 (14)                         |
| 3,4-dihydroxybenzaldehyde <sup>b</sup>  | 139-85-5   | +               | 4.55                 | <u>137.07 → 136.11 (21)</u><br>137.07 → 91.09 (24)<br>137.07 → 92.13 (25)   |
| 2,5-dihydroxybenzoic acid <sup>b</sup>  | 490-79-9   | +               | 4.74                 | <u>152.96 → 108.00 (24)</u><br>152.96 → 81.02 (21)<br>152.96 → 109.01 (16)  |
| Procyanidin B1 <sup>c</sup>             | 20315-25-7 | -               | 4.76                 | <u>577.03 → 407.06 (26)</u><br>577.03 → 288.93 (25)<br>577.03 → 424.97 (26) |

|                                           |             |   |      |                                                                             |
|-------------------------------------------|-------------|---|------|-----------------------------------------------------------------------------|
| 2,6-dihydroxybenzoic acid <sup>b</sup>    | 303-07-1    | + | 4.86 | <u>153.00 → 109.05 (17)</u><br>153.00 → 65.09 (21)<br>153.00 → 135.02 (16)  |
| 3,5-dihydroxybenzoic acid <sup>b</sup>    | 99-10-5     | + | 4.90 | <u>152.97 → 109.01 (15)</u><br>152.97 → 65.06 (16)<br>152.97 → 67.05 (20)   |
| Catechin <sup>b</sup>                     | 225937-10-0 | + | 5.02 | <u>289.00 → 245.02 (17)</u><br>289.00 → 203.11 (22)                         |
| Procyanidin B2 <sup>b</sup>               | 29106-49-8  | - | 5.50 | <u>577.03 → 407.06 (26)</u><br>577.03 → 288.93 (25)<br>577.03 → 424.97 (26) |
| 2,5-dihydroxybenzaldehyde <sup>b</sup>    | 1194-98-5   | + | 5.50 | <u>136.99 → 108.02 (21)</u><br>136.99 → 81.08 (18)<br>136.99 → 109.04 (14)  |
| 4-hydroxybenzaldehyde <sup>b</sup>        | 123-08-0    | + | 5.62 | <u>122.97 → 95.05 (13)</u><br>122.97 → 51.10 (36)<br>122.97 → 77.05 (20)    |
| 3-hydroxybenzaldehyde <sup>b</sup>        | 90-02-8     | + | 5.63 | <u>121.02 → 93.05 (20)</u><br>121.02 → 92.05 (23)<br>121.02 → 120.04 (19)   |
| 3-hydroxybenzoic acid <sup>b</sup>        | 99-06-9     | + | 5.68 | <u>136.94 → 93.07 (14)</u><br>136.94 → 65.09 (24)<br>136.94 → 91.01 (32)    |
| Chlorogenic acid <sup>b</sup>             | 327-97-9    | + | 5.77 | <u>353.00 → 191.07 (22)</u><br>353.00 → 85.09 (43)<br>353.00 → 93.07 (45)   |
| 3,4-dimethoxybenzoic acid <sup>d</sup>    | 93-07-2     | + | 5.92 | <u>182.96 → 137.08 (6)</u><br>182.96 → 106.99 (22)                          |
| Caffeic Acid <sup>b</sup>                 | 331-39-5    | - | 5.92 | <u>178.98 → 135.03 (19)</u><br>178.98 → 134.01 (28)                         |
| Epigallocatechingallate <sup>e</sup>      | 989-51-5    | + | 6.00 | <u>457.15 → 169.05 (21)</u><br>457.15 → 125.09 (42)<br>457.15 → 305.09 (21) |
| Procyanidin C1 <sup>b</sup>               | 37064-30-5  | - | 6.01 | <u>577.03 → 288.93 (25)</u><br>577.03 → 407.06 (26)<br>577.03 → 424.97 (26) |
| Epicatechin <sup>b</sup>                  | 490-46-0    | + | 6.11 | <u>289.00 → 245.02 (17)</u><br>289.00 → 203.11 (22)                         |
| Petunidin-3-O-glucoside <sup>b</sup>      | 6988-81-4   | + | 6.49 | <u>303.02 → 115.08 (50)</u><br>303.02 → 173.07 (33)<br>303.02 → 257.07 (27) |
| Procyanidin A1 <sup>d</sup>               | 103883-03-0 | - | 6.50 | <u>577.03 → 288.93 (25)</u><br>577.03 → 407.06 (26)<br>577.03 → 424.97 (26) |
| Gallocatechingallate <sup>b</sup>         | 4233-96-9   | + | 6.59 | <u>457.15 → 169.05 (21)</u><br>457.15 → 125.09 (42)<br>457.15 → 305.09 (21) |
| Trans-4-hydroxycinnamic acid <sup>b</sup> | 501-98-4    | + | 7.12 | <u>163.02 → 119.07 (18)</u><br>163.02 → 93.07 (37)<br>163.02 → 117.05 (38)  |
| Epicatechingallate <sup>b</sup>           | 1257-08-5   | + | 7.13 | <u>441.13 → 289.13 (30)</u><br>441.13 → 125.08 (42)<br>441.13 → 169.05 (24) |
| 7-hydroxycoumarin <sup>d</sup>            | 779-27-1    | + | 7.14 | <u>162.99 → 107.04 (22)</u><br>162.99 → 77.05 (34)<br>162.99 → 91.05 (20)   |

|                                            |             |   |       |                                                                             |
|--------------------------------------------|-------------|---|-------|-----------------------------------------------------------------------------|
| Catechingallate <sup>b</sup>               | 130405-40-2 | + | 7.17  | <u>441.13 → 289.13 (20)</u><br>441.13 → 125.08 (42)<br>441.13 → 169.05 (24) |
| Procyanidin A2 <sup>b</sup>                | 41743-41-3  | - | 7.35  | <u>577.09 → 287.00 (32)</u><br>577.09 → 136.98 (62)<br>577.09 → 425.08 (13) |
| Orientin <sup>c</sup>                      | 28608-75-5  | - | 7.64  | <u>447.16 → 327.14 (23)</u><br>447.16 → 357.16 (22)                         |
| Delphinidin <sup>cf</sup>                  | 528-53-0    | + | 7.81  | <u>303.02 → 229.07 (32)</u><br>303.02 → 115.08 (50)<br>303.02 → 173.07 (33) |
| 3,4-dimethoxybenzaldehyde <sup>b</sup>     | 120-14-9    | + | 8.23  | <u>167.01 → 139.05 (13)</u><br>167.01 → 108.05 (21)<br>167.01 → 124.03 (18) |
| Cyanidin <sup>b,f</sup>                    | 528-58-5    | + | 8.87  | <u>287.02 → 128.10 (46)</u><br>287.02 → 109.06 (39)<br>287.02 → 115.08 (45) |
| 4-methoxybenzaldehyde <sup>d</sup>         | 123-11-5    | + | 9.05  | <u>136.97 → 109.05 (12)</u><br>136.97 → 77.05 (23)<br>136.97 → 94.04 (18)   |
| Quercetin-3-glucuronide <sup>b</sup>       | 22688-79-5  | + | 9.21  | <u>479.09 → 461.50 (14)</u><br>479.09 → 302.96 (18)                         |
| Quercetin-3-rutinoside <sup>b</sup>        | 207671-50-9 | - | 9.39  | <u>609.18 → 270.92 (96)</u><br>609.18 → 178.87 (44)<br>609.18 → 300.01 (37) |
| Quercetin-3-glucoside <sup>b</sup>         | 482-35-9    | + | 9.41  | <u>465.07 → 256.90 (41)</u><br>465.07 → 302.97 (14)                         |
| Petunidin <sup>b,f</sup>                   | 1429-30-7   | + | 9.43  | <u>317.03 → 302.05 (25)</u><br>317.03 → 217.03 (40)<br>317.03 → 245.03 (36) |
| Pelargonidin <sup>cf</sup>                 | 134-04-3    | + | 10.09 | <u>271.05 → 121.10 (33)</u><br>271.05 → 115.14 (45)<br>271.05 → 141.15 (34) |
| Myricetin <sup>d</sup>                     | 529-44-2    | + | 10.30 | <u>319.00 → 153.02 (31)</u><br>319.00 → 217.06 (31)<br>319.00 → 245.06 (27) |
| Peonidin <sup>cf</sup>                     | 134-01-0    | + | 10.60 | <u>301.03 → 286.08 (24)</u><br>301.03 → 201.07 (38)<br>301.03 → 229.07 (38) |
| Malvidin <sup>cf</sup>                     | 643-84-5    | + | 10.90 | <u>331.11 → 315.14 (30)</u><br>331.11 → 242.13 (31)<br>331.11 → 287.14 (30) |
| 3,4,5-trimethoxycinnamic acid <sup>b</sup> | 90-50-6     | + | 11.08 | <u>239.03 → 221.04 (11)</u><br>239.03 → 162.99 (27)<br>239.03 → 190.01 (19) |
| 3,5-dimethoxybenzaldehyde <sup>b</sup>     | 7311-34-4   | + | 11.23 | <u>167.15 → 124.03 (17)</u><br>167.15 → 77.05 (26)                          |
| Quercetin <sup>b</sup>                     | 117-39-5    | + | 11.70 | <u>303.09 → 229.10 (28)</u><br>303.09 → 153.04 (33)                         |
| Kaempferol <sup>b</sup>                    | 520-18-3    | - | 12.27 | <u>285.07 → 184.91 (30)</u><br>285.07 → 239.12 (35)                         |
| Apigenin <sup>c</sup>                      | 520-36-5    | - | 12.31 | <u>269.09 → 117.12 (37)</u><br>269.09 → 149.12 (26)<br>269.09 → 151.06 (26) |
| Chrysin <sup>e</sup>                       | 480-40-0    | + | 13.05 | <u>253.13 → 143.18 (30)</u><br>253.13 → 63.20 (34)                          |

<sup>a</sup> Underlined MS/MS transition used for quantification purpose. <sup>b</sup> Sigma Aldrich GmbH (Steinheim, Germany), <sup>c</sup> Extrasynthese (Genay, France), <sup>d</sup> TCI (Tokyo Chemical Industry) (Tokyo, Japan), <sup>e</sup> Alpha Aesar (Kandel, Germany), <sup>f</sup> Anthocyanidins detection after acid hydrolysis.

**Table S2.** LC-MS/MS performance for the 22 polyphenols identified in the blueberry extracts.

| Compound                  | R <sup>2</sup> | Calibration curve    | IDL (µg L <sup>-1</sup> ) <sup>a</sup> |
|---------------------------|----------------|----------------------|----------------------------------------|
| Gallic acid               | 0.9972         | y = 3331.7x + 230025 | 0.93                                   |
| 3,4-dihydroxybenzoic acid | 0.9975         | y = 3487.2x - 132653 | 0.14                                   |
| 3,4-dihydroxybenzaldehyde | 9.9982         | y = 1967.4x + 1E+6   | 1.07                                   |
| Procyanidin B1            | 0.9960         | y = 3184.4x + 140717 | 0.11                                   |
| Catechin                  | 0.9995         | y = 1496x - 31807    | 27.6                                   |
| Procyanidin B2            | 0.9979         | y = 625x - 48344     | 47.4                                   |
| Chlorogenic acid          | 0.9956         | y = 16186x - 891959  | 0.75                                   |
| Caffeic Acid              | 0.9953         | y = 39450x + 2E+7    | 1.3                                    |
| Procyanidin C1            | 0.9902         | y = 42.606x + 17205  | 16.3                                   |
| Epicatechin               | 0.9980         | y = 1941.7x + 426449 | 17.8                                   |
| Petunidin-3-O-glucoside   | 0.9998         | y = 9E+7x - 1E+7     | 11.4                                   |
| Epicatechingallate        | 0.9901         | y = 954.26x - 623942 | 30.3                                   |
| Procyanidin A2            | 0.9993         | y = 21030x - 3E+6    | 1.26                                   |
| Delphinidin               | 0.9928         | y = 4E+6 + 26225     | 467.15                                 |
| Cyanidin                  | 0.9897         | y = 4E+6 - 23912     | 415.6                                  |
| Quercetin-3-rutinoside    | 0.9987         | y = 1120.7x + 7982.5 | 1.38                                   |
| Quercetin-3-glucoside     | 0.9920         | y = 236.35x + 73648  | 2.68                                   |
| Petunidin                 | 0.9895         | y = 7E+6 + 200420    | 71.1                                   |
| Myricetin                 | 0.9974         | y = 1279.5x + 189066 | 25.6                                   |
| Peonidin                  | 0.9998         | y = 3E+7 + 494341    | 33.1                                   |
| Malvidin                  | 0.9957         | y = 8E+6x - 2E+7     | 293.3                                  |
| Quercetin                 | 0.9976         | y = 2973.1x - 911531 | 12.01                                  |

<sup>a</sup> IDLs were calculated as the concentration giving a signal-to-noise ratio of three (S/N = 3) in all cases, since none of the target compounds were detected in the mobile phase chromatographic blanks
